# Supplementary material for: Skp2 Stabilizes Mcl-1 and Confers Radioresistance in Colorectal Cancer
Source: Research Square preprint supplement (doi:10.21203/rs.3.rs-645311/v1), 2021-07-07
Supplement: Supplementary file 1 [file f2b9d5049430fcebb60052b4.docx]

Supplementary Table 2: Relationships between the expression of Skp2 and clinical pathological characteristics in 87 patients with CRC.

| **Expression of Skp2  *p -*value** | | | | |
| --- | --- | --- | --- | --- |
| **Characteristics** | **All cases** | **Low(n=34)** | **High(n=53)** |  |
| **Gender** |  |  |  | 0.897 |
| Male | 53 | 21 | 32 |  |
| Female | 34 | 13 | 21 |  |
| **Age(years)** |  |  |  | 0.761 |
| ≤60 | 35 | 13 | 22 |  |
| ＞60 | 52 | 21 | 31 |  |
| **Initial clinical stage** |  |  |  |  |
| ≤Ⅱa | 39 | 23 | 16 | 0.298 |
| ＞Ⅱa | 48 | 11 | 37 |  |
| **Tumor stages** |  |  |  | 0.0006* |
| T1+T2 | 35 | 16 | 19 |  |
| T3+T4 | 52 | 18 | 34 |  |
| **Lymph nodes status** |  |  |  | 0.0000* |
| N0(negative) | 45 | 27 | 18 |  |
| N1 or above(positive) | 42 | 7 | 35 |  |

Chi-square test.

**p*<0.05 indicates a significant association among the variables.
